# Supplementary material
Source: Springer Nature journal article supplement (https://www.springermedizin.de/resource/supplementary/12957_2012_1166_MOESM4_ESM.pdf/9561838)

**a**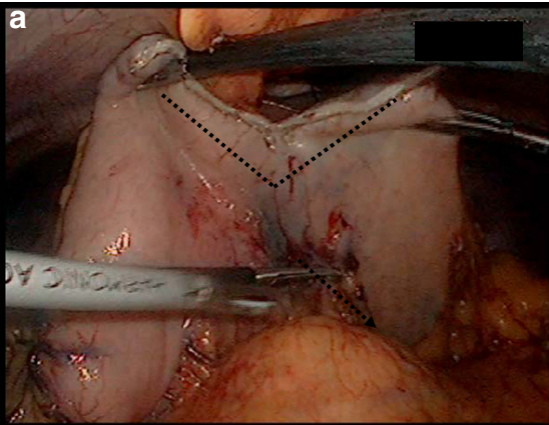**b**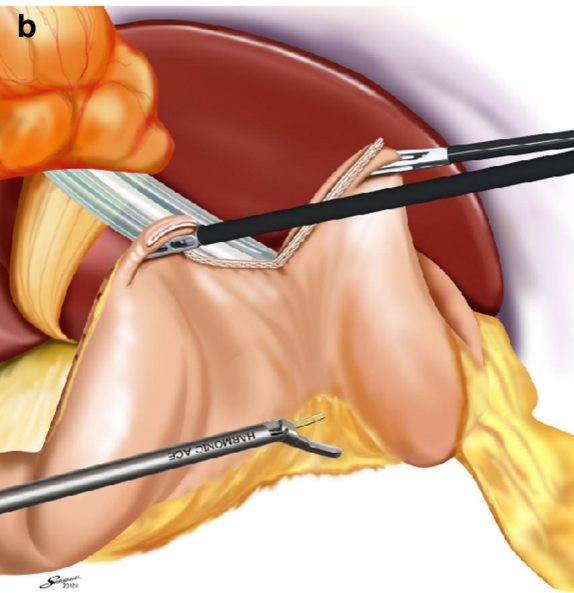

Supplement: MOESM4 [file 9561838]
